# Supplementary material for: Association between longer hospitalization and development of de novo donor specific antibodies in simultaneous liver–kidney transplant recipients
Source: PubMed Central journal article supplement (PMC6968335; doi:10.1080/0886022x.2019.1705338), 2019-12-26
Supplement: IRNF_A_1705338_SM2221.pdf [file IRNF_A_1705338_SM2221.pdf]

# **Association between Longer Hospitalization and Development of de novo Donor Specific Antibodies in Simultaneous Liver- Kidney Transplant Recipients**

**Masahiko Yazawa, MD, PhD<sup>1,2,3</sup>, Orsolya Cseprekal, MD, PhD<sup>1,2,4</sup>, Ryan A. Helmick,  
MD<sup>1,2</sup>, Manish Talwar, MD<sup>1,2</sup>, Vasanthi Balaraman, MD<sup>1,2</sup>, Pradeep S. B. Podila, PhD,  
MS, MHA<sup>5,6</sup>, Sallyanne Fossey, PhD, D(ABHI)<sup>7</sup>, Sanjaya K. Satapathy, MD, MS<sup>8</sup>,  
James D. Eason, MD<sup>1,2</sup>, Miklos Z. Molnar\*, MD, PhD<sup>1,2,4,9</sup>**

**\*Corresponding author:**

**Miklos Z Molnar, M.D., Ph.D., FEBTM, FERA, FASN**

Associate Professor of Medicine, University of Tennessee Health Science Center

James D. Eason Transplant Institute, Methodist University Hospital

Methodist Transplant Epidemiology Research Group

1211 Union Ave, Memphis, TN, United States, 38104

Phone: 1-901-516-0751

Fax: 1-901-516-8994

E-mail: [mzmolnar@uthsc.edu](mailto:mzmolnar@uthsc.edu)

**Supplementary Information**

**Supplementary Table 1.** Probability of long hospital stay in main analysis (>14 days versus ≤14 days) and in sensitivity analysis (>28 days versus ≤28 days) using logistic regression analysis

| Covariates                         | Main analysis (>14 days) |                |                | Sensitivity analysis (>28 days) |                         |                |
|------------------------------------|--------------------------|----------------|----------------|---------------------------------|-------------------------|----------------|
|                                    | Odds ratio               | 95% CI         | <i>P</i> value | Odds ratio                      | 95% CI                  | <i>P</i> value |
| <b>Recipient information</b>       |                          |                |                |                                 |                         |                |
| Age (+1 year)                      | 1.11                     | 1.01 to 1.23   | 0.029          | 1.44                            | 0.91 to 2.27            | 0.120          |
| Gender (vs male)                   | 0.57                     | 0.08 to 4.05   | 0.570          | 0.10                            | 0.001 to 7.99           | 0.308          |
| BMI (+ 1 unit: kg/m <sup>2</sup> ) | 0.76                     | 0.60 to 0.95   | 0.018          | 1.19                            | 0.81 to 1.77            | 0.373          |
| Race                               |                          |                |                |                                 |                         |                |
| Caucasian (vs African American)    | 0.35                     | 0.02 to 5.61   | 0.458          | 0.06                            | <0.001 to 10.1          | 0.280          |
| Other (vs African American)        | 0.45                     | 0.02 to 8.79   | 0.599          | 3.94                            | 0.02 to 1022.5          | 0.629          |
| Marital status married (vs other)  | 1.32                     | 0.23 to 7.43   | 0.755          | 0.41                            | 0.007 to 22.7           | 0.665          |
| Insurance                          |                          |                |                |                                 |                         |                |
| Medicaid (vs. private)             | 25.8                     | 0.09 to 7388.5 | 0.260          | <0.001                          | <0.00001 to >10,000,000 | 0.457          |
| Medicare (vs. private)             | 0.28                     | 0.03 to 2.52   | 0.255          | 0.007                           | <0.001 to 14.7          | 0.202          |
| Cause of ESLD                      |                          |                |                |                                 |                         |                |
| Alcoholic hepatitis (vs. HCV)      | 47.8                     | 1.90 to 1202.5 | 0.019          | 360.5                           | 0.7 to 185498.8         | 0.065          |

|                                                            |        |                 |       |          |                  |       |
|------------------------------------------------------------|--------|-----------------|-------|----------|------------------|-------|
| HCV and Alcoholic hepatitis (vs. HCV)                      | 315.7  | 1.33 to 74871.4 | 0.039 | N/A      | N/A              | N/A   |
| NASH (vs. HCV)                                             | 51.7   | 0.86 to 3094.9  | 0.059 | 75.8     | 0.41 to 13941.3  | 0.104 |
|                                                            | 1099.1 | 12.6 to 96162.7 | 0.002 | 361094.5 | 0.34 to          | 0.070 |
| Other (vs. HCV)                                            |        |                 |       |          | >10,000,000      |       |
| Comorbidity – diabetes (vs. absence)                       | 4.26   | 0.51to 35.7     | 0.182 | 123.1    | 0.51 to 29580.5  | 0.085 |
|                                                            | 12.4   | 0.69 to 223.7   | 0.088 | 1954001  | 0.41 to          | 0.065 |
| Comorbidity – hypertension (vs. absence)                   |        |                 |       |          | >10,000,000      |       |
| MELD score (+1 score)                                      | 1.54   | 1.18 to 2.01    | 0.001 | 1.77     | 0.99 to 3.17     | 0.055 |
| First discharge destination                                |        |                 |       |          |                  |       |
| Home with health service (vs. home without health service) | 0.72   | 0.09 to 5.89    | 0.762 | 0.27     | <0.001 to 95.1   | 0.665 |
| Rehabilitation hospital (vs. home without health service)  | 261.2  | 8.02 to 8509.3  | 0.002 | 85230.4  | 1.14 to          | 0.047 |
|                                                            |        |                 |       |          | >10,000,000      |       |
|                                                            | 39.4   | 1.47 to 1062.0  | 0.029 | 110966.8 | 1.66 to          | 0.040 |
| Other (vs. home without health service)                    |        |                 |       |          | >10,000,000      |       |
| Delayed graft function on allograft kidney (vs. absence)   | 80.5   | 2.80 to 2312.3  | 0.010 | 3422.1   | 0.14 to          | 0.114 |
|                                                            |        |                 |       |          | >1,000,000       |       |
| Blood type                                                 |        |                 |       |          |                  |       |
| Type A (vs. type O)                                        | 0.41   | 0.05 to 3.25    | 0.400 | 0.02     | <0.001 to 7.07   | 0.199 |
| Type B (vs. type O)                                        | 0.006  | 0.0001 to 0.26  | 0.008 | <0.001   | <0.00001 to 27.5 | 0.134 |
|                                                            | 9.92   | <0.00001 to     | 0.750 | 42364.2  | 1.06 to          | 0.049 |
| Type AB (vs. type O)                                       |        | >10,000,000     |       |          | >10,000,000      |       |

**Supplementary Table 2.** Probability of development of de-novo DSA and any post-transplant DSA using unadjusted and propensity score adjusted logistic regression models in sensitivity analysis.

|                                       | Risk of de novo DSA |            |                | Risk of any post-transplant DSA |           |                |
|---------------------------------------|---------------------|------------|----------------|---------------------------------|-----------|----------------|
|                                       | Odds ratio          | 95% CI     | <i>p</i> value | Odds ratio                      | 95% CI    | <i>p</i> value |
| Un-adjusted                           |                     |            |                |                                 |           |                |
| Length of hospital stay (each 5 days) | 1.09                | 1.02-1.16  | 0.010          | 1.08                            | 1.02-1.15 | 0.011          |
| Adjusted                              |                     |            |                |                                 |           |                |
| Length of hospital stay (each 5 days) | 1.15                | 1.02-1.28  | 0.017          | 1.11                            | 1.01-1.21 | 0.022          |
| PS score                              | 0.07                | 0.001-4.00 | 0.200          | 0.30                            | 0.18-5.16 | 0.408          |

Abbreviations: DSA: Donor specific antibody; PS: Propensity score; 95% CI: 95% confidence interval
